# Supplementary material for: Diurnal Variation of Sweet Taste Recognition Thresholds Is Absent in Overweight and Obese Humans
Source: PubMed Central journal article supplement (PMC5872715; doi:10.3390/nu10030297), 2018-03-02
Supplement: nutrients-10-00297-s001.pdf [file nutrients-10-00297-s001.pdf]

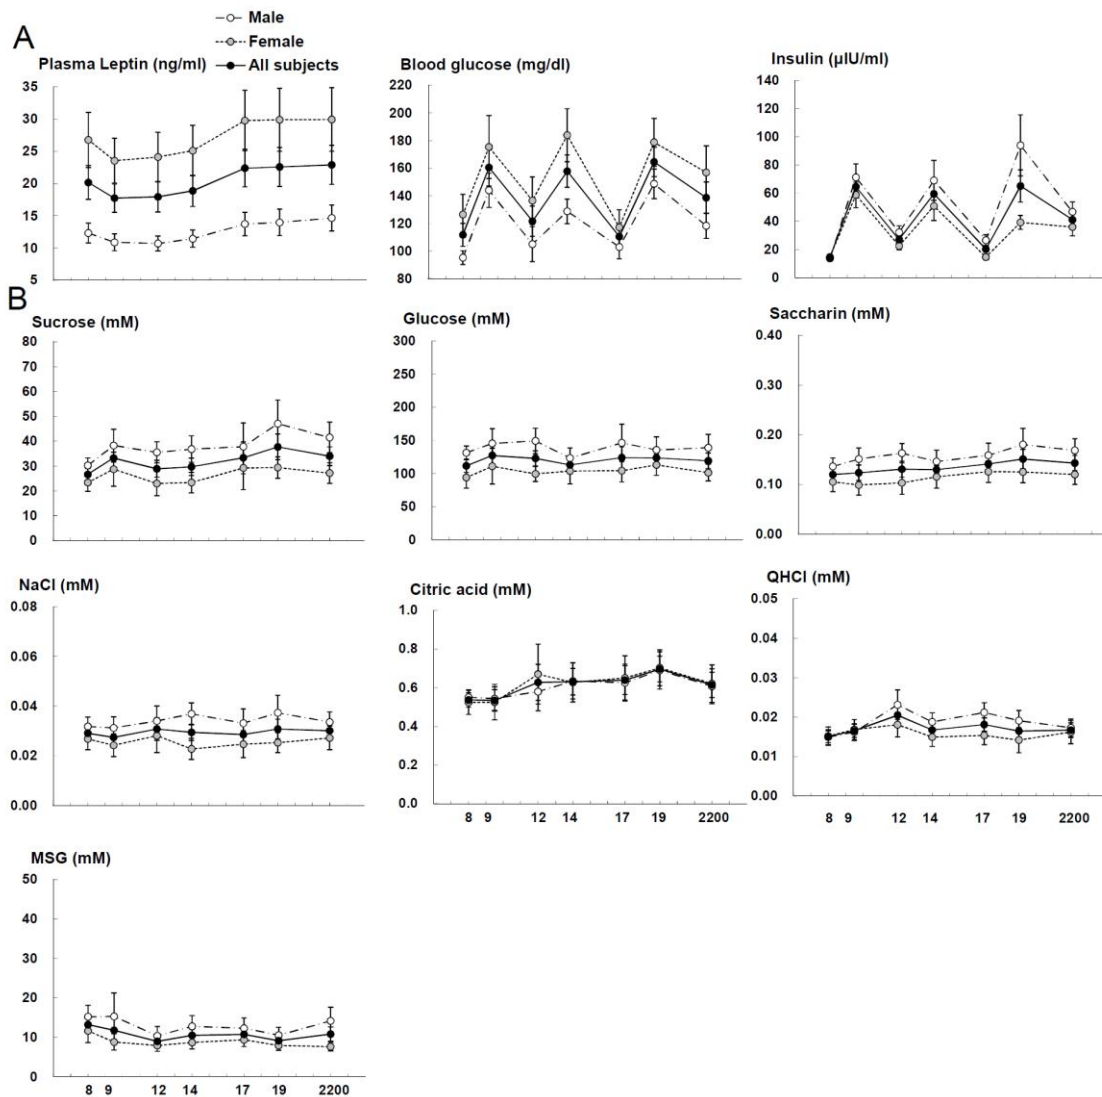

**Figure S1.** Time courses of plasma, leptin, blood glucose, plasma insulin levels, and taste recognition thresholds. Mean plasma leptin, blood glucose and plasma insulin levels (A), and recognition thresholds for seven taste stimuli (B) measured at seven different time points during the day from 08:00 a.m. to 1022:00 a.m. in over-weight and obese subjects ( $n = 36$ ). The values at each point are absolute values.

**Table S1.** Statistical analyses of time-dependent changes in leptin levels and recognition thresholds-.

|                                   | One-Way Repeated-Measures ANOVA |          |                 |          |                     |          | Two-Way Repeated-Measures ANOVA |          |                                |          |
|-----------------------------------|---------------------------------|----------|-----------------|----------|---------------------|----------|---------------------------------|----------|--------------------------------|----------|
|                                   | Male (n=17)                     |          | Female (n=19)   |          | All subjects (n=36) |          | Effect of gender                |          | Gender-Time change interaction |          |
|                                   | <i>F</i>                        | <i>P</i> | <i>F</i>        | <i>P</i> | <i>F</i>            | <i>P</i> | <i>F</i>                        | <i>P</i> | <i>F</i>                       | <i>P</i> |
| Leptin (ng/ml)                    | (6, 112) = 0.95                 | NS       | (6, 126) = 0.42 | NS       | (6, 245) = 0.70     | NS       | (1, 34) = 9.54                  | <0.01    | (6, 204) = 1.52                | NS       |
| Blood glucose (mg/dl)             | (6, 112) = 4.42                 | <0.001   | (6, 126) = 2.30 | <0.05    | (6, 245) = 4.77     | <0.001   | (1, 34) = 3.01                  | NS       | (6, 204) = 1.63                | NS       |
| Insulin (μIU/ml)                  | (6, 112) = 6.77                 | <0.001   | (6, 126) = 7.89 | <0.001   | (6, 245) = 11.6     | <0.001   | (1, 34) = 4.03                  | NS       | (6, 204) = 3.27                | <0.01    |
| Taste recognition thresholds (mM) |                                 |          |                 |          |                     |          |                                 |          |                                |          |
| Sucrose                           | (6, 111) = 0.59                 | NS       | (6, 125) = 0.29 | NS       | (6, 243) = 0.73     | NS       | (1, 34) = 3.51                  | NS       | (6, 202) = 0.35                | NS       |
| Glucose                           | (6, 112) = 0.22                 | NS       | (6, 125) = 0.14 | NS       | (6, 244) = 0.20     | NS       | (1, 34) = 3.60                  | NS       | (6, 203) = 0.26                | NS       |
| Saccharin                         | (6, 109) = 0.39                 | NS       | (6, 121) = 0.26 | NS       | (6, 237) = 0.49     | NS       | (1, 34) = 3.24                  | NS       | (6, 196) = 0.32                | NS       |
| NaCl                              | (6, 109) = 0.16                 | NS       | (6, 121) = 0.14 | NS       | (6, 237) = 0.12     | NS       | (1, 34) = 1.70                  | NS       | (6, 196) = 0.65                | NS       |
| Citric acid                       | (6, 112) = 0.37                 | NS       | (6, 126) = 0.43 | NS       | (6, 245) = 0.74     | NS       | (1, 34) = 0.012                 | NS       | (6, 204) = 0.21                | NS       |
| QHCl                              | (6, 112) = 1.25                 | NS       | (6, 126) = 0.24 | NS       | (6, 245) = 0.84     | NS       | (1, 34) = 0.92                  | NS       | (6, 204) = 1.20                | NS       |
| MSG                               | (6, 105) = 0.40                 | NS       | (6, 119) = 0.56 | NS       | (6, 231) = 0.65     | NS       | (1, 34) = 1.01                  | NS       | (6, 190) = 1.91                | NS       |

The table is based on data shown in Figure S1; NS, not significant

**Table S2.** Plasma leptin, blood glucose, insulin levels, and taste recognition thresholds in non-obese and over-weight/obese subjects.

|                                   | Non-obese*    | Over-weight/obese | <i>P<sub>p</sub></i> |
|-----------------------------------|---------------|-------------------|----------------------|
| Number of subjects                | 47            | 36                |                      |
| Age                               | 25.04 ± 0.39  | 42.89 ± 2.23      | <0.001               |
| Leptin (ng/ml)                    | 6.43 ± 0.74   | 20.2 ± 2.7        | <0.001               |
| Blood glucose (mg/dl)             | 96.3 ± 2.0    | 102.3 ± 5.2       | NS                   |
| Insulin (μIU/mL)                  | 6.7 ± 0.67    | 14.1 ± 1.2        | <0.001               |
| HOMA-IR                           | 1.46 ± 0.16   | 3.69 ± 0.45       | <0.001               |
| QUICKI                            | 0.38 ± 0.008  | 0.32 ± 0.0036     | <0.001               |
| Taste recognition thresholds (mM) |               |                   |                      |
| Sucrose                           | 23.0 ± 2.5    | 26.8 ± 2.5        | NS                   |
| Glucose                           | 95.3 ± 7.7    | 113.1 ± 10.6      | NS                   |
| Saccharin                         | 0.087 ± 0.011 | 0.11 ± 0.011      | NS                   |
| NaCl                              | 24.8 ± 2.7    | 29.4 ± 3.0        | NS                   |
| Citric acid                       | 0.47 ± 0.06   | 0.55 ± 0.05       | NS                   |
| QHCl                              | 0.012 ± 0.001 | 0.015 ± 0.002     | NS                   |
| MSG                               | 4.2 ± 0.6     | 11.5 ± 1.8        | <0.001               |

Data show mean ± S.E. at 08:00 [a.m.](#) after overnight fasting. *P<sub>p</sub>* < 0.001 by unpaired *t* test between values for non-obese and obese subjects. NS, not significant. \* Nakamura *et al.*, *Diabetes* **2008**, *57*, 2661–5
